# Supplementary material for: Rational pore engineering reveals the relative contribution of enzymatic sites and self-assembly towards rapid ferroxidase activity and mineralization: impact of electrostatic guiding and cage-confinement in bacterioferritin
Source: Royal Society of Chemistry journal article supplement (doi:10.1039/d4sc07021f), 2025-01-01
Supplement: d4sc07021f1.pdf [file d4sc07021f1.pdf]

## Supporting Information

### **Rational pore engineering reveals the relative contribution of enzymatic sites and self-assembly towards rapid ferroxidase activity and mineralization: Impact of electrostatic guiding and cage-confinement in bacterioferritin**

Akankshika Parida<sup>#</sup>, Gargee Bhattacharyya<sup>#</sup>, Swagatika Mallik<sup>#</sup>, Rabindra K. Behera<sup>\*</sup>

*Department of Chemistry, National Institute of Technology, Rourkela - 769008, Odisha, India.*

<sup>#</sup> These authors contributed equally

<sup>\*</sup>To whom correspondence should be addressed: Rabindra K. Behera, Tel: +91-661-2462980;

Fax: +91-661-2462651; E-mail: [beherarabi@nitrkl.ac.in](mailto:beherarabi@nitrkl.ac.in)

**Table S1. Oligonucleotide primers designed for site-directed mutagenesis.**

| <i>Mtb</i> BfrA variants | Oligonucleotide primer (5' to 3')                     |
|--------------------------|-------------------------------------------------------|
| E121A_For                | CGGCAACGATTTT <u><b>CGCC</b></u> CAGCAGTACGGCG        |
| E121A_Rev                | CGCCGTACTGCTG <u><b>GCG</b></u> AAAATCGTTGCCG         |
| E121Q_For                | GGCAACGATTTT <u><b>TGC</b></u> CAGCAGTACGGCGC         |
| E121Q_Rev                | GCGCCGTACTGCT <u><b>GCAG</b></u> AAAATCGTTGCC         |
| E121K_For                | CGGCAACGATTTT <u><b>TTC</b></u> CAGCAGTACGGCGCT       |
| E121K_Rev                | AGCGCCGTACTGCT <u><b>GAA</b></u> GAAAATCGTTGCCG       |
| E121F_For                | TCGTCGGCAACGATTTT <u><b>GAA</b></u> CAGCAGTACGGCGCTGG |
| E121F_Rev                | CCAGCGCCGTACTGCTG <u><b>TTC</b></u> AAAATCGTTGCCGACGA |

Changes in the nucleotide base pair positions are underlined and highlighted in bold.

**Table S2: Overexpression conditions employed for assembly-defective 3-fold pore variants of *Mtb* BfrA (E121K and E121F).**

| <i>Mtb</i> BfrA Variant  | Condition        | IPTG (mM) | Incubation period after IPTG induction | rpm | Temperature after IPTG induction | Betaine (mM) | Sorbitol (mM) | Inference (Cage-assembly) |
|--------------------------|------------------|-----------|----------------------------------------|-----|----------------------------------|--------------|---------------|---------------------------|
| <b>E121K</b>             | 1                | 0.5       | 4 hrs                                  | 200 | 37°C                             | 2.5          | -             | Partial                   |
|                          | 2                | 0.5       | 4 hrs                                  | 200 | 37°C                             | 2.5          | 660           | Partial                   |
|                          | 3                | 0.25      | 10 hrs                                 | 100 | 25°C                             | -            | -             | Partial                   |
| <b>E121F</b>             | 4                | 0.5       | 4 hrs                                  | 200 | 37°C                             | 2.5          | -             | None                      |
|                          | 5                | 0.5       | 4 hrs                                  | 200 | 37°C                             | 2.5          | 660           | None                      |
|                          | 6                | 0.25      | 10 hrs                                 | 100 | 25°C                             | -            | -             | None                      |
| <b>E121K &amp; E121F</b> | Routine protocol | 0.5       | 4 hrs                                  | 200 | 37°C                             | -            | -             | None                      |

**Table S3. Average hydrodynamic diameters of apo- and iron biomineral encapsulated ferritin protein samples determined from dynamic light scattering (DLS) studies.**

| Ferritin | Hydrodynamic size (nm) |                          |                          |
|----------|------------------------|--------------------------|--------------------------|
|          | Apo-ferritin*          | 100 Fe/cage <sup>†</sup> | 480 Fe/cage <sup>†</sup> |
| WT       | 12.6 ± 0.4             | 12.6 ± 0.9               | 13.5 ± 0.9               |
| E121A    | 11.7 ± 1.1             | 11.7 ± 1.0               | 13.5 ± 1.0               |
| E121Q    | 13.5 ± 1.9             | 13.5 ± 1.3               | 15.7 ± 1.3               |
| E121K    | 5.6 ± 0.6              | 15.7 ± 1.6               | 50.7 ± 2.5               |
| E121F    | 8.7 ± 0.8              | 16.9 ± 1.8               | 32.7 ± 3.6               |

\*Apo-ferritin hydrodynamic sizes were obtained from Fig. 2.

<sup>†</sup>Hydrodynamic sizes for mineralized ferritins were determined from Fig. S11.

**Table S4. Apparent kinetic parameters for the formation of [Fe<sup>3+</sup>-O]<sub>x</sub> species (measured at 350 nm) by the *Mtb* BfrA variants, obtained by non-linear fitting to the Hill equation (see methods and Fig. S5).**

| Ferritin | Apparent Parameters |                                                  |                         |                                                                       |                      |
|----------|---------------------|--------------------------------------------------|-------------------------|-----------------------------------------------------------------------|----------------------|
|          | v <sub>max</sub> *  | k <sub>cat</sub> <sup>†</sup><br>s <sup>-1</sup> | K <sub>m</sub> ,<br>M   | k <sub>cat</sub> /K <sub>m</sub> ,<br>M <sup>-1</sup> s <sup>-1</sup> | Hill coefficient (n) |
| WT       | 0.19 ± 0.01         | 0.18 ± 0.01                                      | 14.9 × 10 <sup>-6</sup> | 1 × 10 <sup>4</sup>                                                   | 2.2 ± 0.3            |
| E121A    | 0.18 ± 0.01         | 0.17 ± 0.01                                      | 19.4 × 10 <sup>-6</sup> | 9 × 10 <sup>3</sup>                                                   | 1.8 ± 0.4            |
| E121Q    | 0.20 ± 0.02         | 0.20 ± 0.02                                      | 20.6 × 10 <sup>-6</sup> | 1 × 10 <sup>4</sup>                                                   | 1.7 ± 0.2            |
| E121K    | 0.03 ± 0.01         | 0.03 ± 0.01                                      | N.D.                    | N.D.                                                                  | N.D.                 |
| E121F    | 0.12 ± 0.02         | 0.12 ± 0.02                                      | 30.5 × 10 <sup>-6</sup> | 4 × 10 <sup>3</sup>                                                   | 1.1 ± 0.1            |

\*Apparent v<sub>max</sub> (ΔA/Δt, sec<sup>-1</sup>)

<sup>†</sup>Determined from the formula for turnover number: k<sub>cat</sub> (apparent) = v<sub>max</sub> (apparent)/[E<sub>T</sub>] where [E<sub>T</sub>] is the total enzyme (i.e BfrA cage) concentration. Here, [E<sub>T</sub>] is maintained as 1.04 μM for all the variants.

N.D. Not determined due to small change in absorbance.

**Table S5. Thermodynamic parameters determined from the chemical and thermal unfolding of WT BfrA and its variants.**

| <i>Mtb</i> BfrA<br>variants | GdnHCl denaturation <sup>†</sup> |                           |              | Thermal denaturation <sup>†</sup> |
|-----------------------------|----------------------------------|---------------------------|--------------|-----------------------------------|
|                             | C <sub>m</sub> (M)               | ΔG <sub>Aq</sub> (kJ/mol) | m (kJ/mol/M) | T <sub>m</sub> (°C)               |
| WT                          | 7.4 ± 0.2*                       | 21.8 ± 2.1*               | 2.9 ± 0.3*   | 90 ± 4*                           |
| E121A                       | 7.0 ± 0.1                        | 18.9 ± 1.9                | 2.6 ± 0.3    | 90 ± 2*                           |
| E121Q                       | 7.0 ± 0.2                        | 22.4 ± 2.4                | 3.1 ± 0.4    | 84 ± 2*                           |
| E121K                       | 1.6 ± 0.1                        | 8.1 ± 1.4                 | 4.7 ± 0.6    | 78 ± 4                            |
| E121F                       | 1.6 ± 0.1                        | 7.2 ± 1.5                 | 4.2 ± 0.5    | 80 ± 3                            |

\*The apparent thermodynamic parameters.

† Parameters for GdnHCl denaturation and thermal denaturation were obtained from **Fig. 6** and **Fig. S13** respectively.

**Table S6: Comparison of the intra-subunit and inter-subunit distances measured from the separation of the 121 residue of respective ferritin variants with R109, E110 and K122 residues. Distance is calculated between the highlighted atoms.**

| Ferritin               | Intra-subunit distances (Å°)                 |                                             |                                | Inter-subunit distances (Å°)                 |                                             |                                |                                             |
|------------------------|----------------------------------------------|---------------------------------------------|--------------------------------|----------------------------------------------|---------------------------------------------|--------------------------------|---------------------------------------------|
|                        | 122* – 121                                   | 121 – 109                                   | 121 – 110                      | 121 – 122*                                   | 121 – 121                                   | 121 – 110                      | 121 – 109                                   |
| <b>WT (Alpha fold)</b> | 9.6<br>(NH <sub>2</sub> – OH)                | 3.1<br>(OH – NH <sub>2</sub> )              | 12.4<br>(OH – OH)              | 11.6<br>(OH – NH <sub>2</sub> )              | 6.5<br>(OH – OH)                            | 14.1<br>(OH – OH)              | 3.6<br>(OH – NH <sub>2</sub> )              |
| <b>WT (3UOI)</b>       | 10.1<br>(NH <sub>2</sub> – OH)               | 2.7<br>(OH – NH <sub>2</sub> )              | 12.4<br>(OH – OH)              | 10.5<br>(OH – NH <sub>2</sub> )              | 6.3<br>(OH – OH)                            | 13.8<br>(OH – OH)              | 3.7<br>(OH – NH <sub>2</sub> )              |
| <b>E121A</b>           | 9.8<br>(NH <sub>2</sub> – H)                 | 5.8<br>(H – NH <sub>2</sub> )               | 15.6<br>(H – OH)               | 15.7<br>(H – NH <sub>2</sub> )               | 10.7<br>(H – H)                             | 17.5<br>(H – OH)               | 10.0<br>(H – NH <sub>2</sub> )              |
| <b>E121Q</b>           | 13.1<br>(NH <sub>2</sub> – NH <sub>2</sub> ) | 3.2<br>(NH <sub>2</sub> – NH <sub>2</sub> ) | 13.6<br>(NH <sub>2</sub> – OH) | 17.2<br>(NH <sub>2</sub> – NH <sub>2</sub> ) | 6.3<br>(NH <sub>2</sub> – NH <sub>2</sub> ) | 16.2<br>(NH <sub>2</sub> – OH) | 5.7<br>(NH <sub>2</sub> – NH <sub>2</sub> ) |
| <b>E121K</b>           | 14.5<br>(NH <sub>2</sub> – NH <sub>2</sub> ) | 6.3<br>(NH <sub>2</sub> – NH <sub>2</sub> ) | 13.2<br>(NH <sub>2</sub> – OH) | 17.0<br>(NH <sub>2</sub> – NH <sub>2</sub> ) | 4.0<br>(NH <sub>2</sub> – NH <sub>2</sub> ) | 15.1<br>(NH <sub>2</sub> – OH) | 8.0<br>(NH <sub>2</sub> – NH <sub>2</sub> ) |
| <b>E121F</b>           | 9.1<br>(NH <sub>2</sub> – C)                 | 8.0<br>(C – NH <sub>2</sub> )               | 18.9<br>(C – OH)               | 13.3<br>(C – NH <sub>2</sub> )               | 10.1<br>(C – C)                             | 21.5<br>(C – OH)               | 10.0<br>(C – NH <sub>2</sub> )              |

\*122 oriented towards the interior

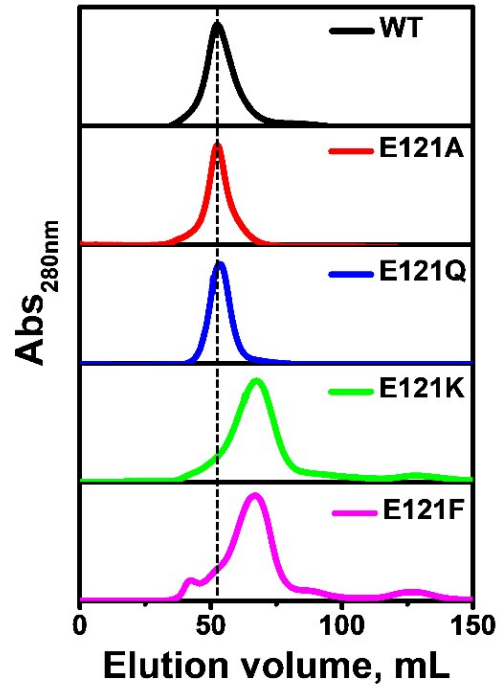

**Figure S1. Elution profile (size exclusion chromatogram) of WT BfrA and its variants.** The as-purified protein samples collected after IEC, were passed through Sephacryl S-300 HR column previously equilibrated with 20 mM Tris containing 100 mM NaCl (pH 8.0). The less intense bands observed at high elution volumes for E121K and E121F are possibly due to the presence of a small amount of nucleic acid (see **Methods**).

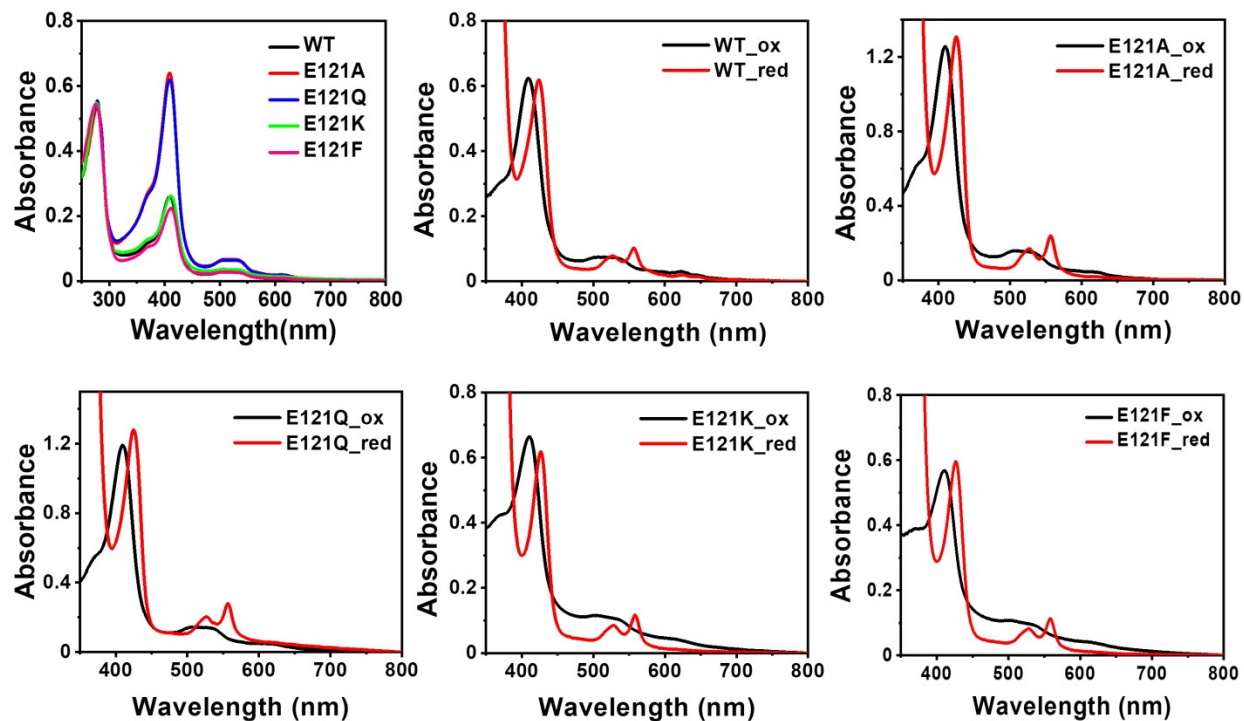

**Figure S2. UV-visible absorption spectra of as-purified WT BfrA and its variants, in their oxidized and reduced form.** The reduction process was initiated by the addition of 20  $\mu\text{L}$  of 5 mM sodium dithionite to 2  $\mu\text{M}$  cage or cage equivalent of protein samples (see **Methods**). The E121A and E121Q variants were found to bind more heme compared to the WT, E121K and E121F variants that exhibited a lower heme content.

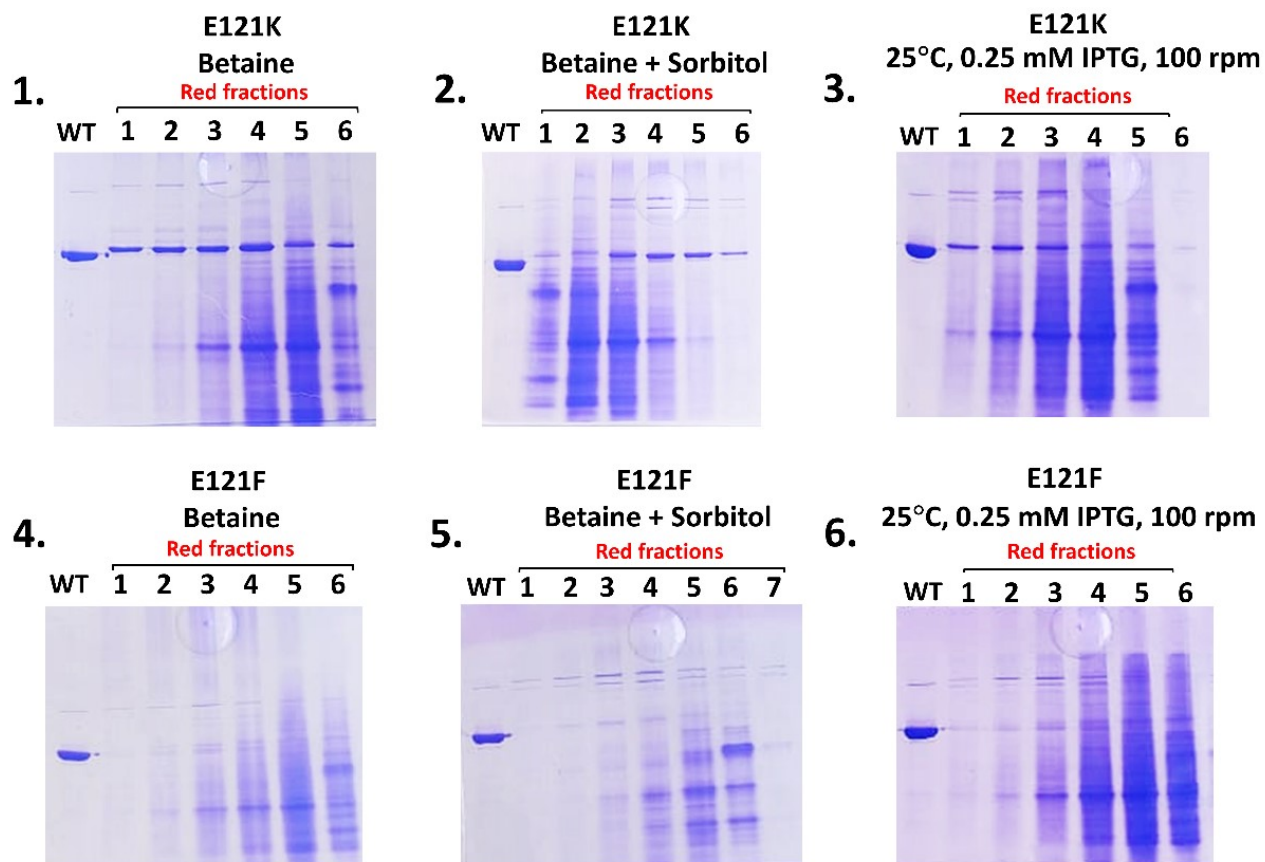

**Figure S3: Native-PAGE (6%) profile of the eluted fractions of assembly-defective variants under modified over-expression conditions.** The E121K variant exhibited partial, but improved, cage-assembly, as indicated by the presence of characteristic gel bands corresponding to cage species, whereas the E121F variant lacked such features. Details of the specific conditions are provided in the accompanying **Table S2**.



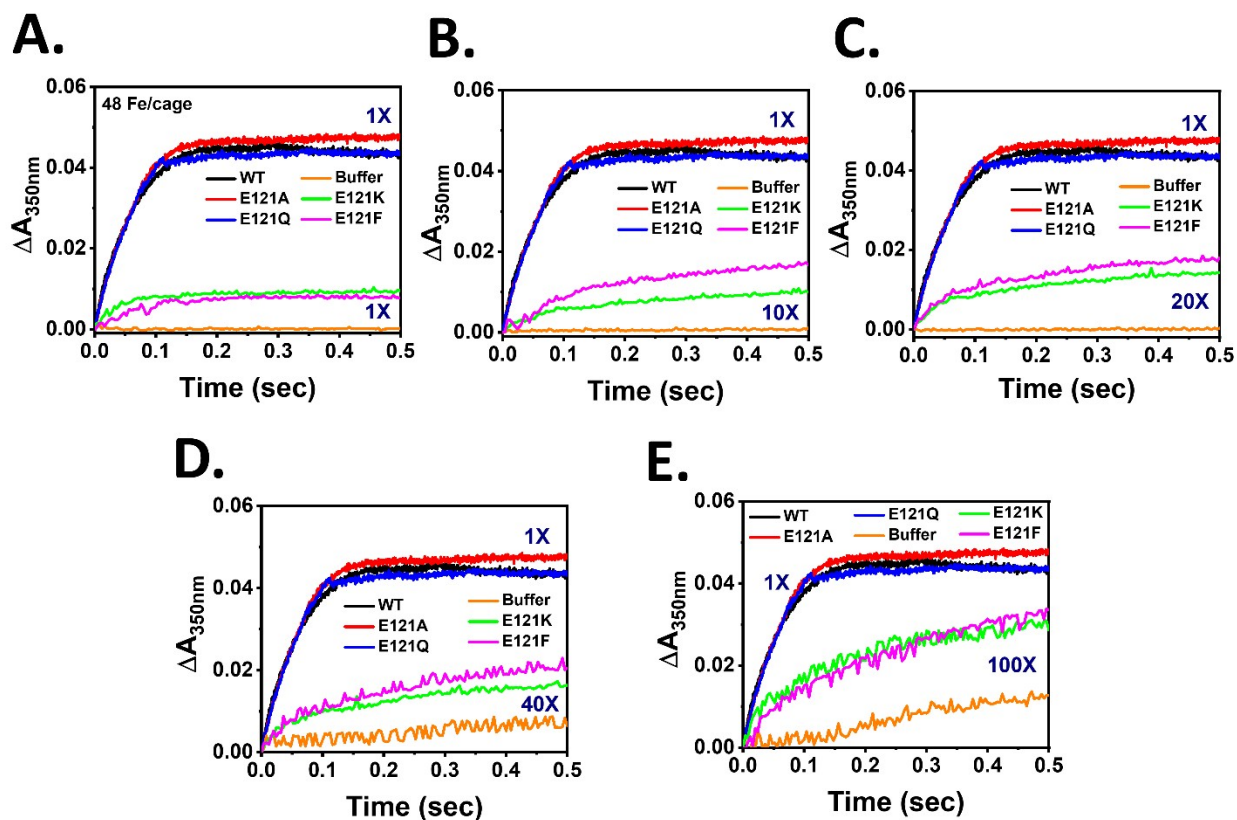

**Figure S4. Comparison of rapid ferroxidase activity between self-assembled variants (~ 48 Fe/cage, 1X) and assembly-defective variants (~ 48 - 4800 Fe/cage, 1X - 100X).** Progress curves of rapid ferroxidase activity of WT BfrA and its variants for the formation of  $[\text{Fe}^{3+}\text{-O}]_x$  species at 350 nm, obtained by a stopped-flow rapid mixing system. For WT and assembled variants, final  $\text{Fe}^{2+}$  concentration was maintained at  $50 \mu\text{M}$  (48 Fe/cage) in all cases. The final concentrations of iron for the assembly-defective variants and buffer were varied from  $50 \mu\text{M}$  (1X) to  $5 \text{mM}$  (100X). Here, buffer indicates autoxidation of respective iron amounts in absence of protein in  $100 \text{mM}$  MOPS (pH 7.0). Final protein concentration was kept as  $1.04 \mu\text{M}$  cage or cage equivalent for all variants. The folds of increase in  $\text{Fe}^{2+}$  concentrations are mentioned in the respective figures (see **Methods**).

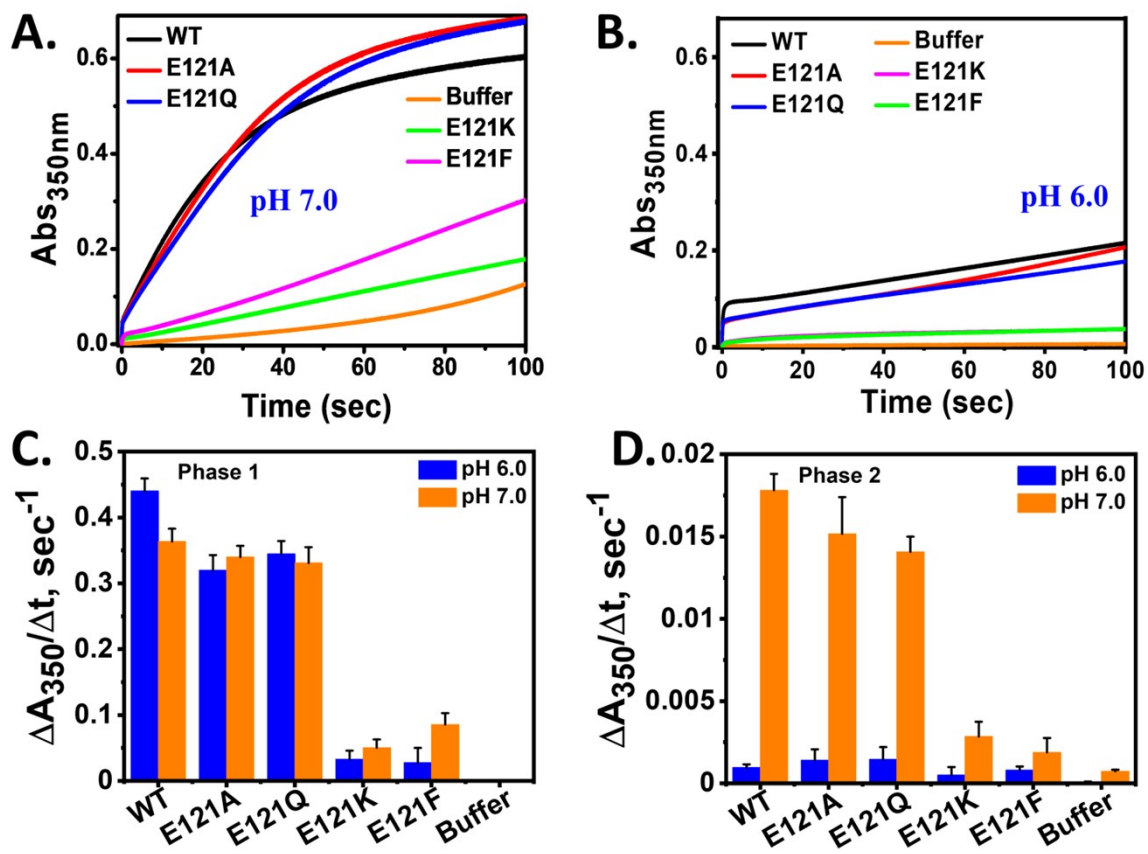

**Figure S5. Impact of pH on the ferroxidase activity of E121 substituted *Mtb* BfrA variants monitored by stopped-flow rapid mixing spectrophotometer.** Progress curves for the formation of  $[\text{Fe}^{3+}\text{-O}]_x$  species at 350 nm for multiple-turnover (i.e., 480 Fe/cage) carried out in (A) 100 mM MOPS (pH 7.0) and (B) 100 mM MES (pH 6.0) and their respective initial rates of formation calculated from the linear fitting of the initial data points upto 120 ms and 5 secs respectively for C. Rapid phase and D. slow phase. Equal volume of 4.16  $\mu\text{M}$  cage or cage equivalent of ferritin in respective buffers were mixed with 2 mM freshly prepared  $\text{FeSO}_4$  solution) in a stopped-flow rapid mixing spectrophotometer to achieve 480 Fe/cage at 25 °C. Buffer represents autoxidation of iron in absence of protein (see **Methods**). For phase 1, p value for pH 6.0:  $\sim 0.035$  and  $< 0.001$  and p value for pH 7.0:  $> 0.05$  and  $< 0.0001$  for the assembled variants and assembly-defective variants (E121K and E121F) respectively, calculated with respect to WT. For phase 2, p value for pH 7.0:  $\sim 0.03$  and  $< 0.001$  for the assembled variants and assembly-defective variants (E121K and E121F) respectively, and p value for pH 6.0:  $> 0.05$  for all the variants computed with respect to WT. The averages are of results of at least three independent experiments, using two different protein batches.

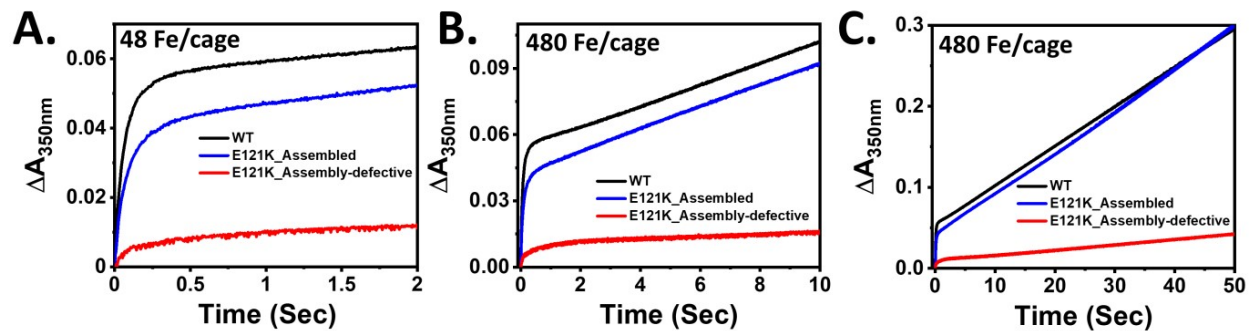

**Fig S6: Comparison of ferroxidase activity of assembly-defective and assembled E121K variant.** Progress curves for the formation of  $[\text{Fe}^{3+}\text{-O}]_x$  species at 350 nm were monitored for WT and the assembled and assembly-defective forms of the E121K variant. Equal volumes of 1.04  $\mu\text{M}$  cage or cage-equivalent protein solutions in 100 mM MOPS (pH 7.0) were mixed with freshly prepared  $\text{FeSO}_4$  solution (in 1 mM HCl) using a stopped-flow rapid mixing spectrophotometer. Measurements were performed at Fe/cage ratios of **A.** 48 and **B.** **C.** 480, with Fig. **C** showing data recorded for 480 Fe/cage over a longer time scale.

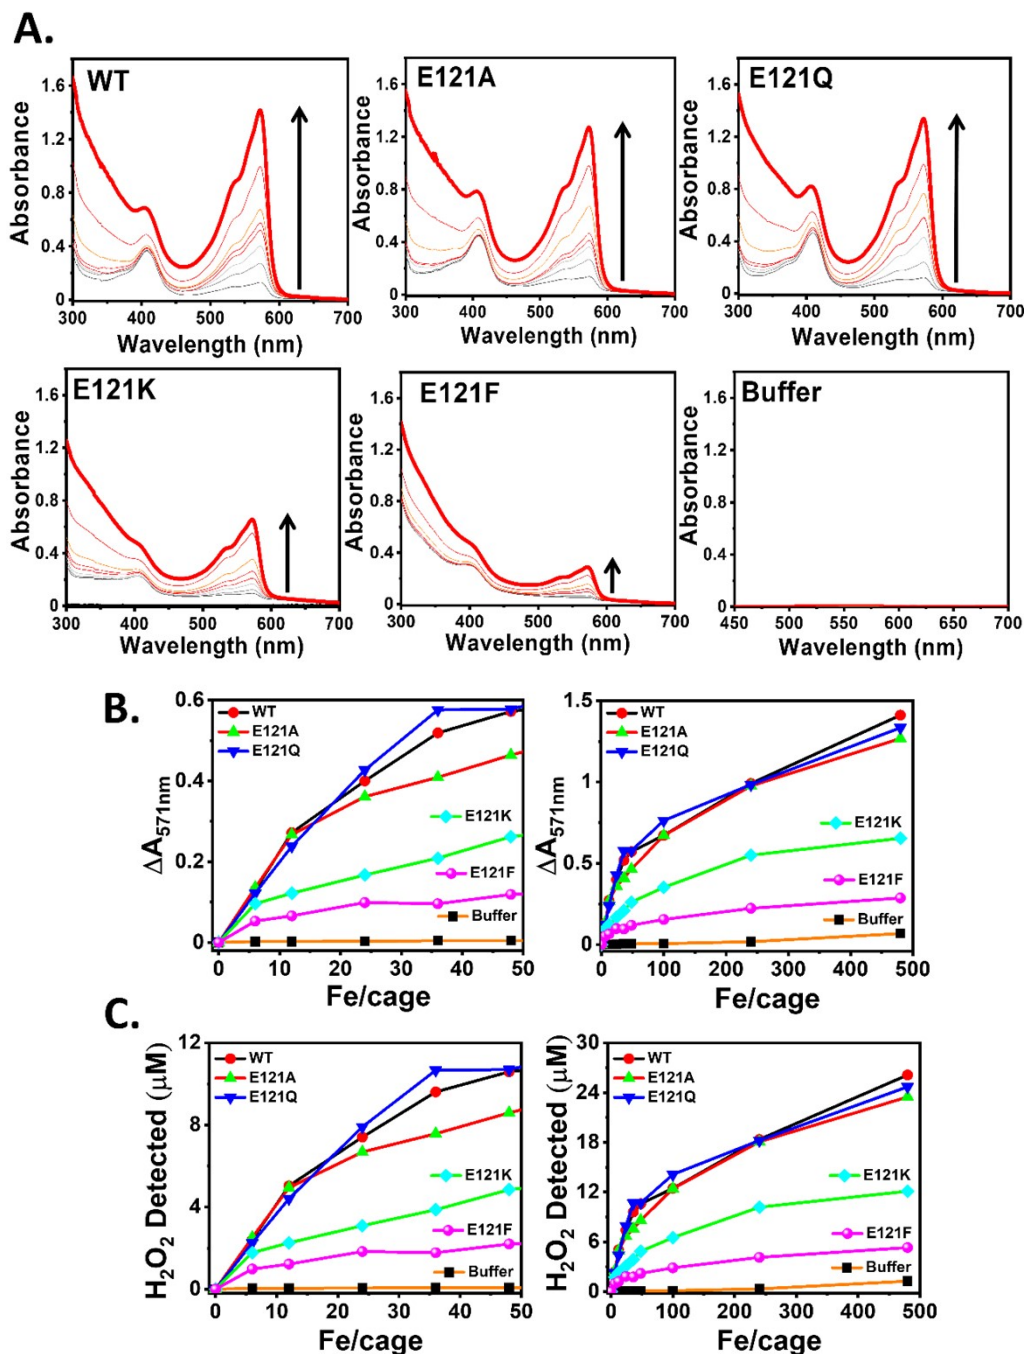

**Figure S7. Detection of in situ generated  $\text{H}_2\text{O}_2$  during ferroxidase/mineralization activity of *Mtb* BfrA variants.** Absorption spectra recorded after  $\sim 3$  min of addition of varying amounts of  $\text{FeSO}_4$  solutions ( $0 - 480 \mu\text{M}$ ) to a reaction mixture containing  $50 \mu\text{M}$  of Amplex red,  $0.5 \mu\text{M}$  of HRP and  $1.04 \mu\text{M}$  cage/cage equivalent of protein solutions in  $100 \text{ mM}$  MOPS ( $\text{pH } 7.0$ ) (A). The change in absorbance at  $571 \text{ nm}$  ( $\Delta A_{571\text{nm}}$ ), characteristic for the formation of resorufin (B) and amount of  $\text{H}_2\text{O}_2$  detected (C) at different Fe/cage ( $0 - 48$  and  $0 - 480$ ) for all the variants.

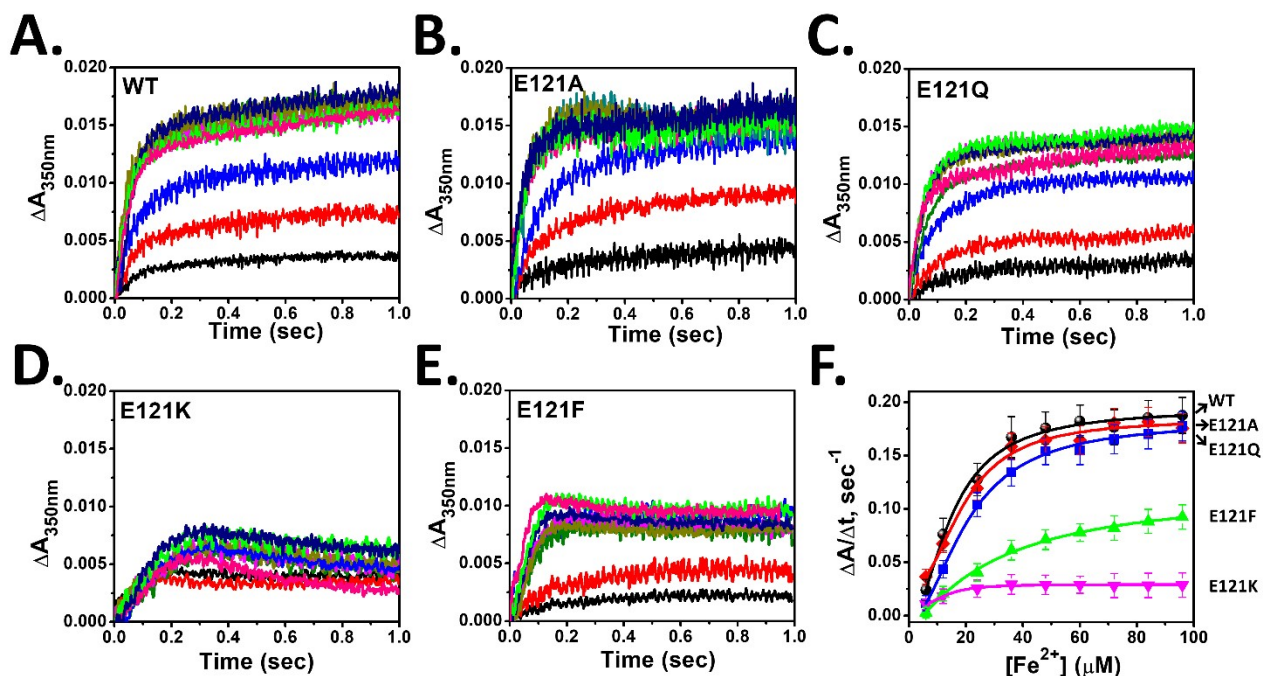

**Figure S8. Titration of WT BfrA and its variants with increasing Fe<sup>2+</sup> concentration.** Progress curves for the formation of [Fe<sup>3+</sup>-O]<sub>x</sub> species at 350 nm with increasing iron concentration in WT BfrA and its variants (A-E). The experiment was carried out in a stopped-flow spectrophotometer by equal mixing 2.08 μM (cage or cage equivalent) of protein solution with varying amounts of FeSO<sub>4</sub> solutions to achieve 6-96 Fe/cage. The initial rates for the formation of [Fe<sup>3+</sup>-O]<sub>x</sub> species were obtained from the linear fitting of the data points (up to ~ 0.03 sec) and were plotted against iron concentration (F). The line represents the fitting of the initial rates with Hill equation (see **Methods**). Apparent kinetic parameters are presented in **Table S3**.



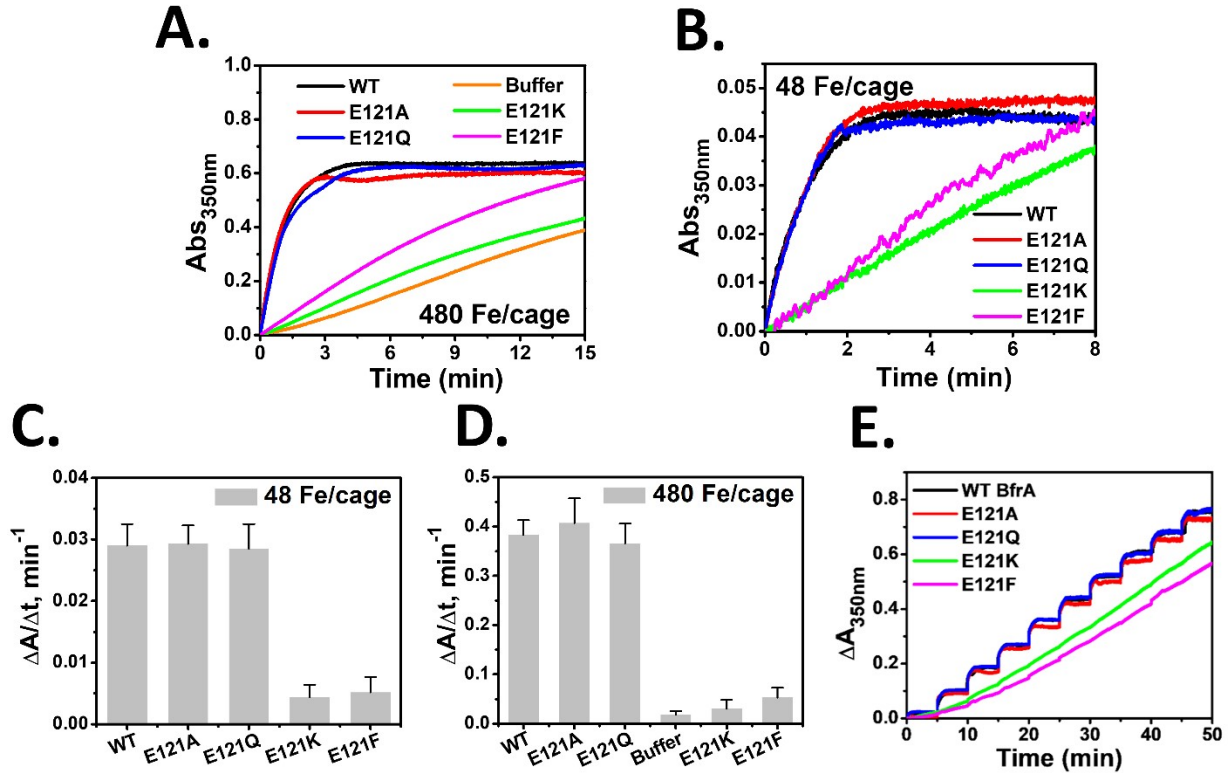

**Figure S9. Iron oxidation/mineralization kinetics of WT BfrA and its variants by manual mixing.** The iron mineralization process was monitored over longer time scale, using a UV-visible spectrophotometer, after manually adding freshly prepared FeSO<sub>4</sub> solution to 1.04  $\mu\text{M}$  of WT BfrA and its variants in 100 mM MOPS buffer (pH 7.0) to achieve 48 (A) and 480 Fe/cage (B). The corresponding initial rates of iron oxidation/mineralization were calculated from the linear fitting of the data points (from panel ‘A’ and ‘B’) within  $\sim 1$  min of data acquisition represented in ‘C’ and ‘D’. The error bars signify the standard deviation obtained from the averages of three independent experiments using two different protein preparations. Sequential iron oxidation in WT *Mtb* BfrA and its variants was studied by monitoring the changes in A<sub>350nm</sub> with ten subsequent additions of 48 Fe/cage, manually, to 1.04  $\mu\text{M}$  ferritin protein solution in 100 mM MOPS buffer (pH 7.0) (E) (see **Methods**). For [Fe<sup>3+</sup>-O]<sub>x</sub> species at 350 nm, p value > 0.05 and < 0.0001 for the assembled variants and assembly-defective variants (E121K and E121F) respectively, calculated with respect to WT. The averages are of results of at least three independent experiments, using two different protein batches.

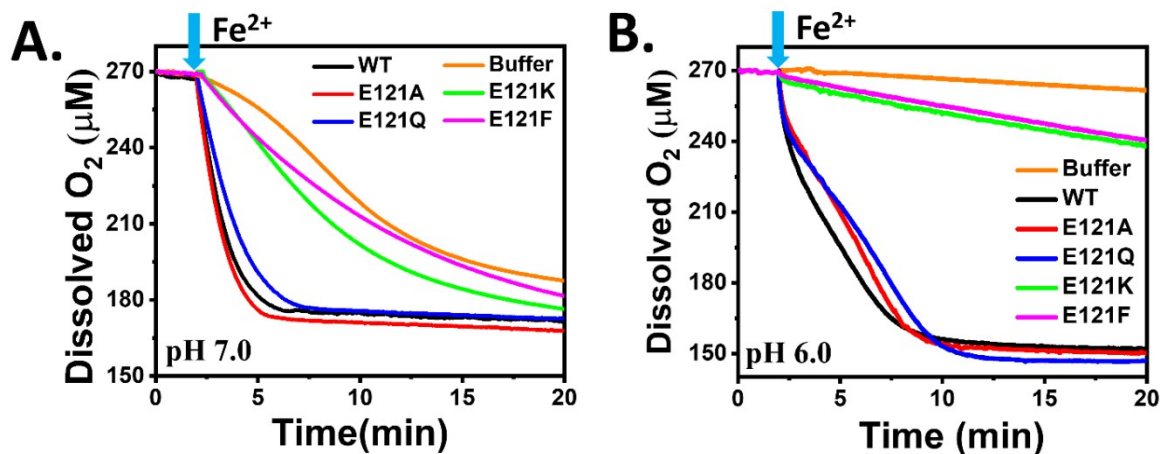

**Figure S10. pH dependent O<sub>2</sub> consumption kinetics during the ferroxidase/mineralization activity of self-assembled and assembly-defective *Mtb* BfrA variants.** Freshly prepared FeSO<sub>4</sub> solutions (240 μM) were added to 0.5 μM protein cage in **A.** 100mM MOPS, pH 7.0 and **B.** 100mM MES, pH 6.0 using a Hamilton syringe to achieve 480 Fe/cage. Arrow indicates the time point of Fe<sup>2+</sup> addition.

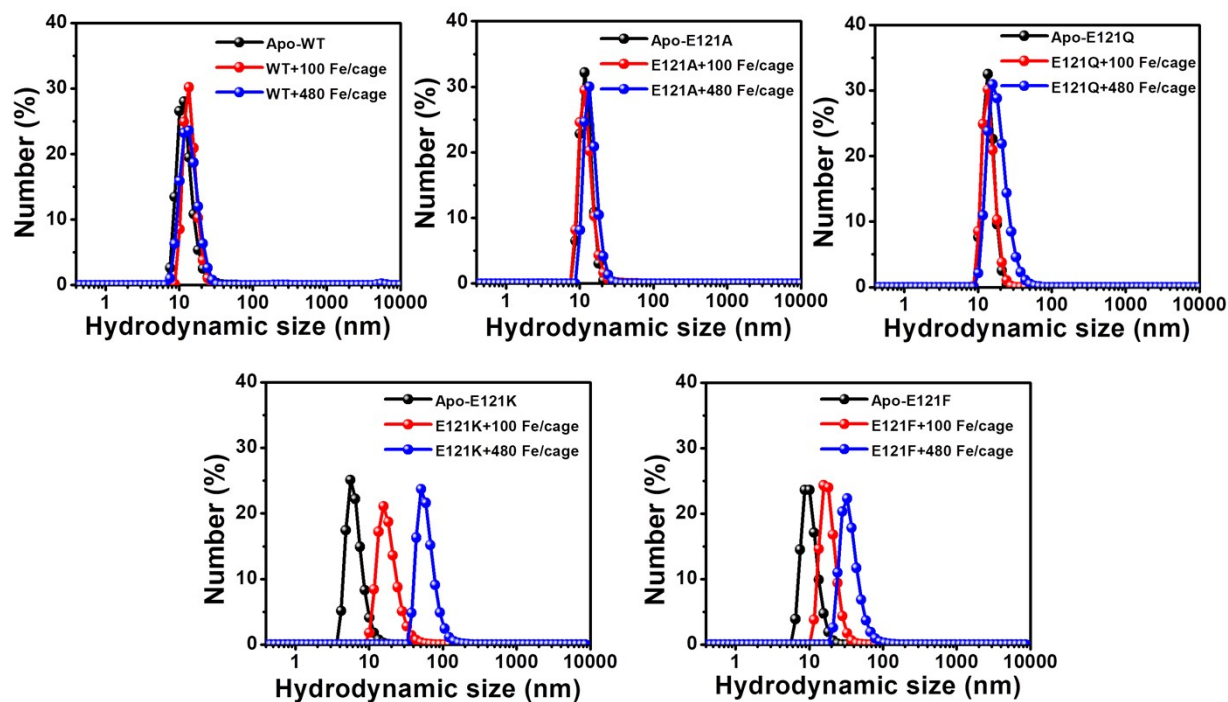

**Figure S11. Dynamic light scattering measurements of apo- and  $\text{Fe}^{2+}$  mineralized samples of WT BfrA and its variants.** The experiment was performed with  $1.04 \mu\text{M}$  cage or cage equivalent of protein solution in 100 mM MOPS (pH 7.0), before and after addition of 100 (4 Fe/subunit) and 480 (20 Fe/subunit) Fe/cage. The experiment was carried out at  $25 \text{ }^\circ\text{C}$ . Hydrodynamic sizes are listed in Table S3.

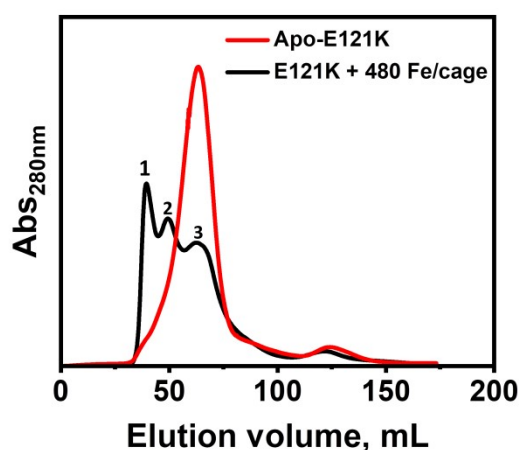

**Figure S12: Size-exclusion chromatogram (SEC) profile of soluble fraction mineralized E121K.** The absorbance profile shows three distinct fractions (1, 2 and 3), with the third fraction coinciding with the apo-protein profile. The additional fractions 1 and 2 possibly correspond to some relatively larger sized species such as: soluble  $\text{Fe}^{3+}$  aggregates (iron-oxide clusters) on the



surface of the protein and/or iron-induced higher order oligomeric assemblies including a small fraction of cage like structure (as observed at 5x higher protein concentrations in **Fig 2B** of the original manuscript).

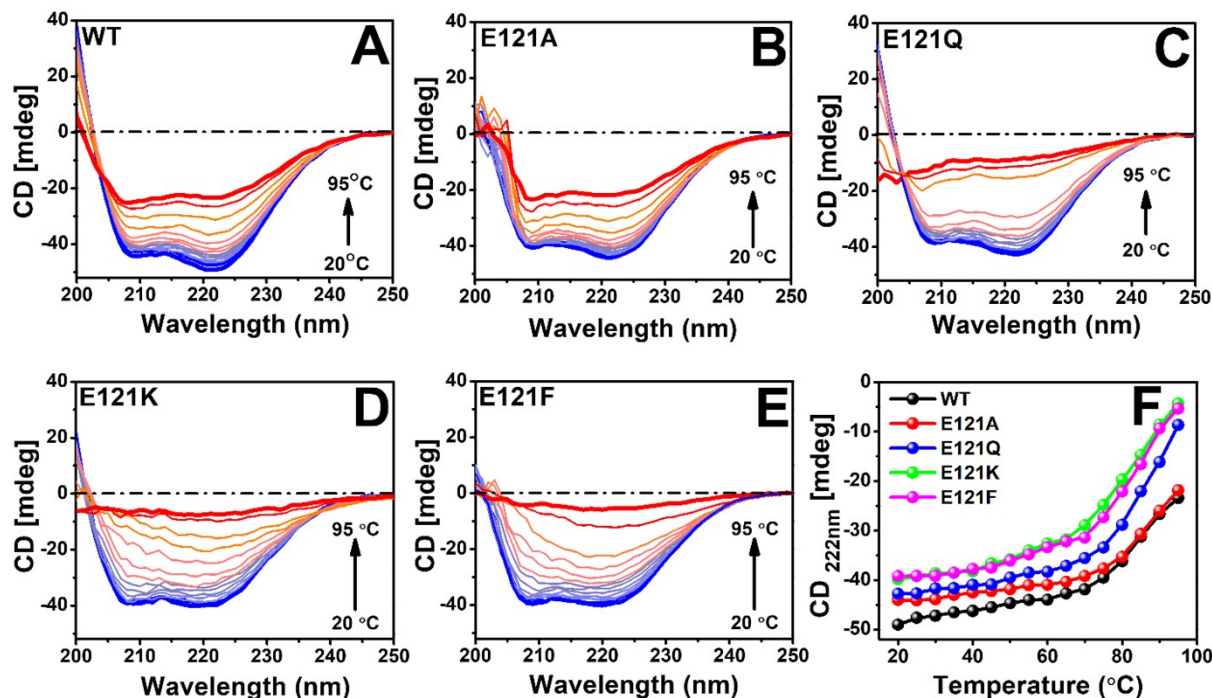

**Figure S13. Temperature induced unfolding of self-assembled and assembly-defective *Mtb* BfrA variants.** Far-UV CD spectra of WT BfrA and its variants were recorded by increasing the temperature from 20–95 °C in a Jasco J-1500 CD spectrometer (A-E). Changes in the CD signal at 222 nm with varying temperature (F). Protein concentration was maintained at 0.25  $\mu$ M cage or cage equivalent (6  $\mu$ M subunit).

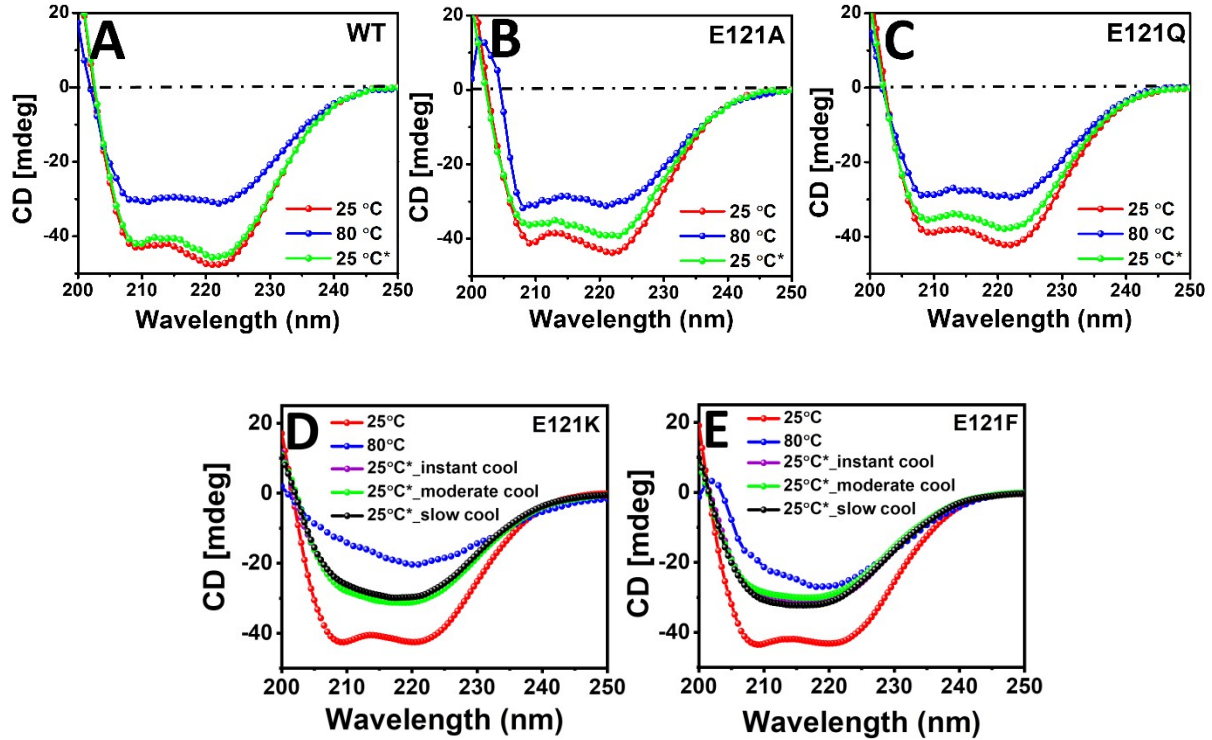

**Figure S14. Far-UV CD spectra of self-assembled and assembly-defective *Mtb* BfrA variants.** The 25 °C\* traces were recorded after cooling back the samples from 80 to 25 °C. For the E121K and E121F variants, 25 °C\* traces were recorded after cooling back the samples from 80 to 25 °C, under three conditions: (1). instant cooling by immersing the sample tube in water (~ 6 mins) (2). moderate cooling at room temperature (~ 21 mins) and (3). slow controlled cooling in a dry bath (~ 1 hour 20 mins). The assembly-defective variants exhibited irreversible unfolding under all conditions as opposed to WT and self-assembled variants (E121A, E121Q), which exhibited reversible unfolding.

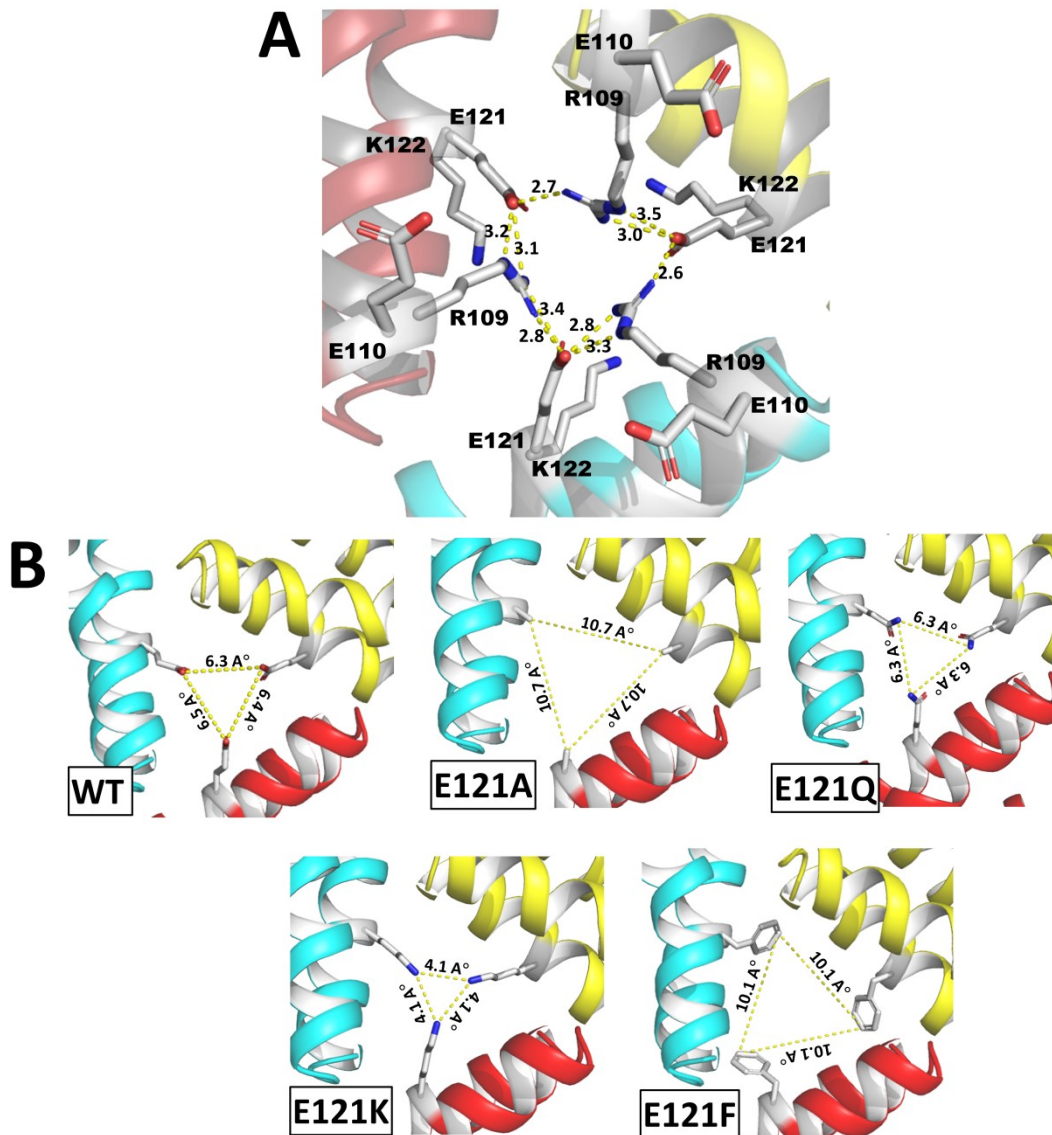

**Figure S15:** **A.** Representation of the inter-subunit interactions between the E121 and R109 residues at the 3-fold pore of WT *Mtb* BfrA. Labeled distances are in Å units. **B.** Inter-subunit distances between 121th residue of the three subunits at the 3-fold pore. The calculations reveal that the distance between E121 and E121 is ~6.4 Å (in WT), whereas F121 and F121 (E121F) is 10.1 Å; with a noteworthy reorientation of K122 (WT: E121 – K122 ~ 12.5 Å; E121F: F121 – K122 ~ 6.6 Å) (Table S6). These values further corroborate the impact of Phe in imparting steric obstruction during self-assembly process in E121F. The unusually greater pore distance in E121A is owing to the shorter side chain of alanine. Structures are obtained using Alpha Fold 3.0<sup>1</sup>.

## RAW DATA FOR FIGURE – 2 and 5

Figure 2A: SDS-PAGE

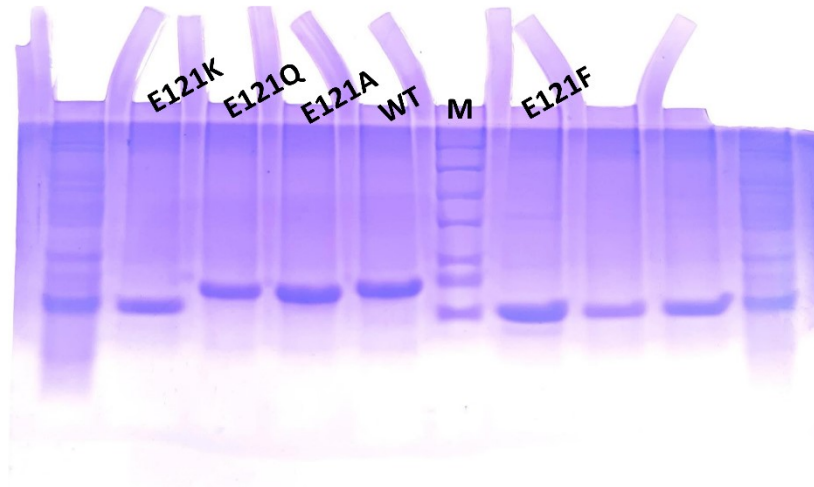

**Figure 2B: Native-PAGE - Prussian (Iron) Staining**

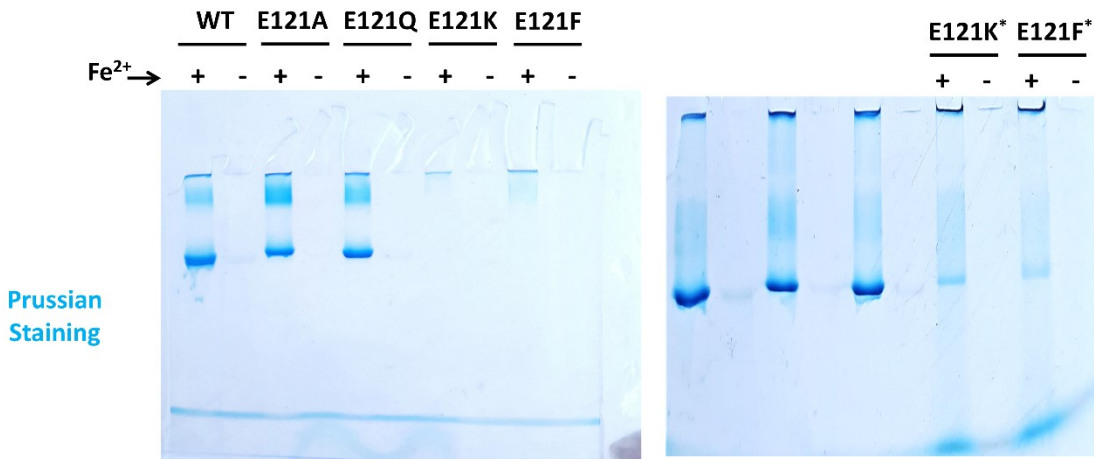

**Figure 2B: Native-PAGE – Coomassie (Protein) Staining**

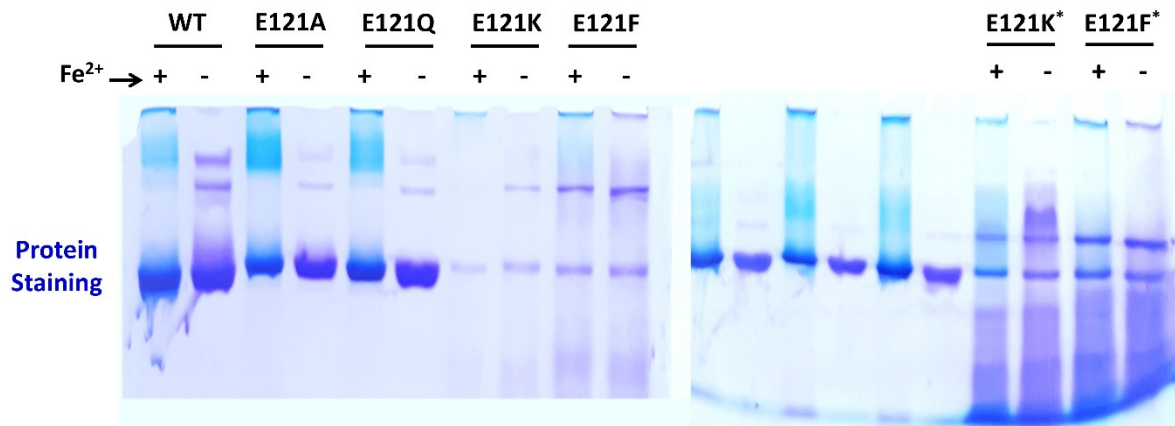



Figure 5B: Native-PAGE - Prussian (Iron) and Coomassie (Protein) Staining

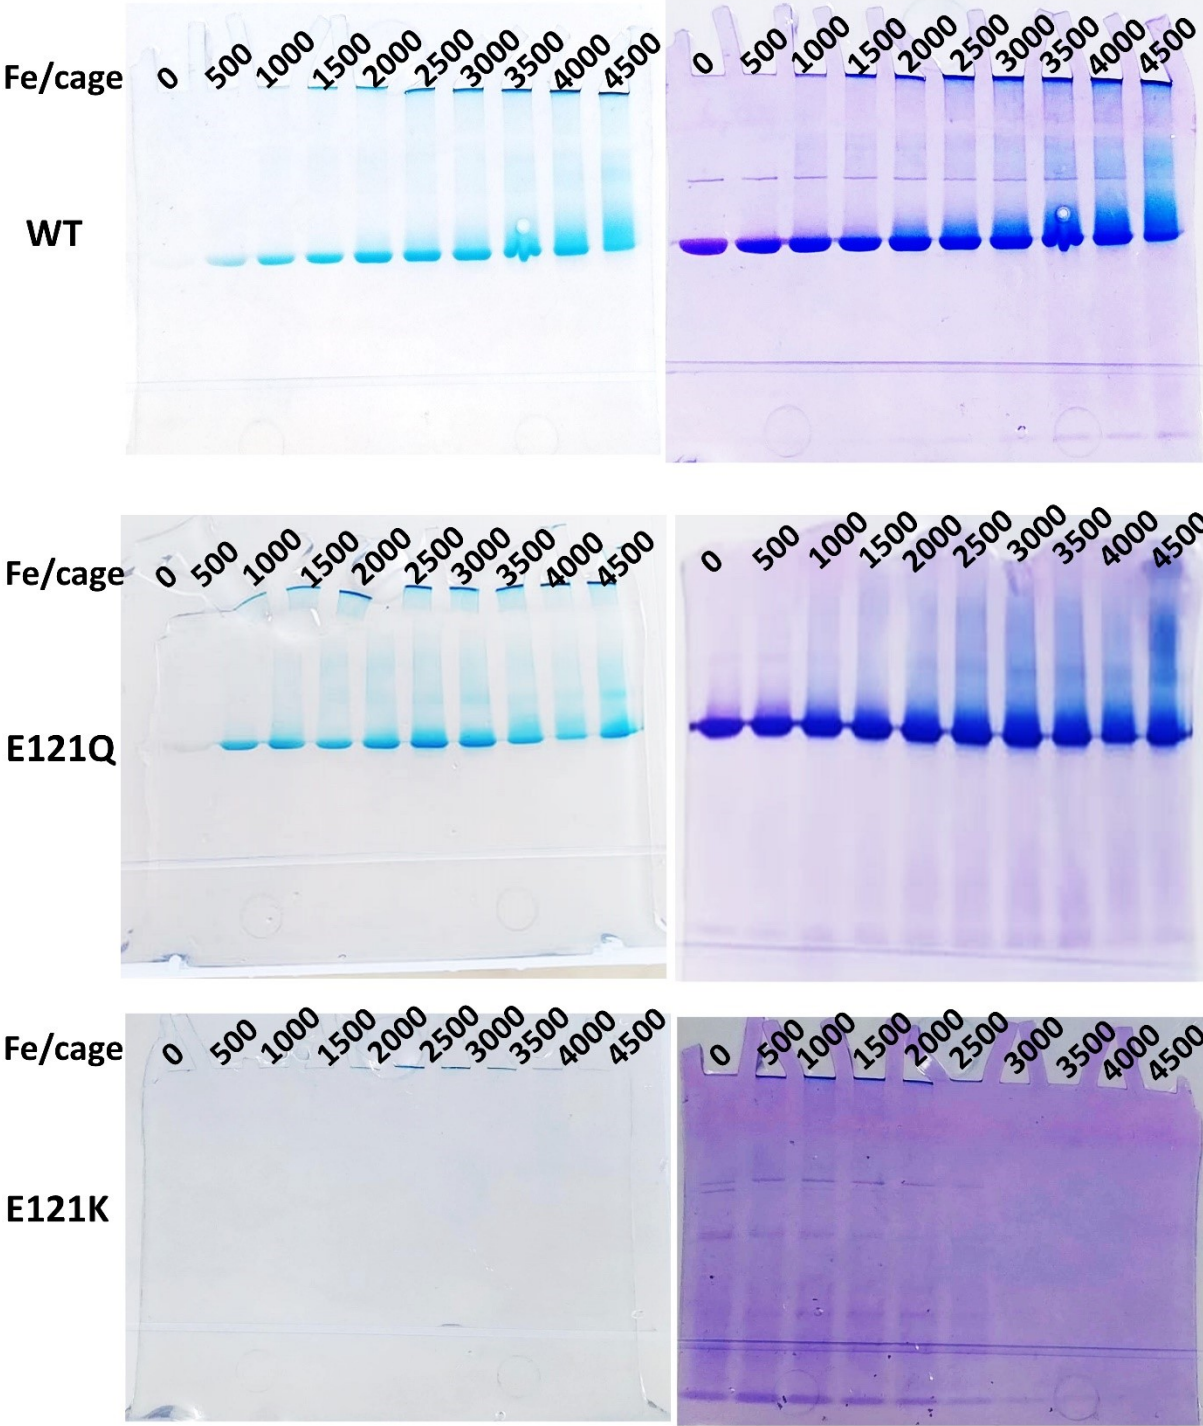

Figure 5C: Agarose gel

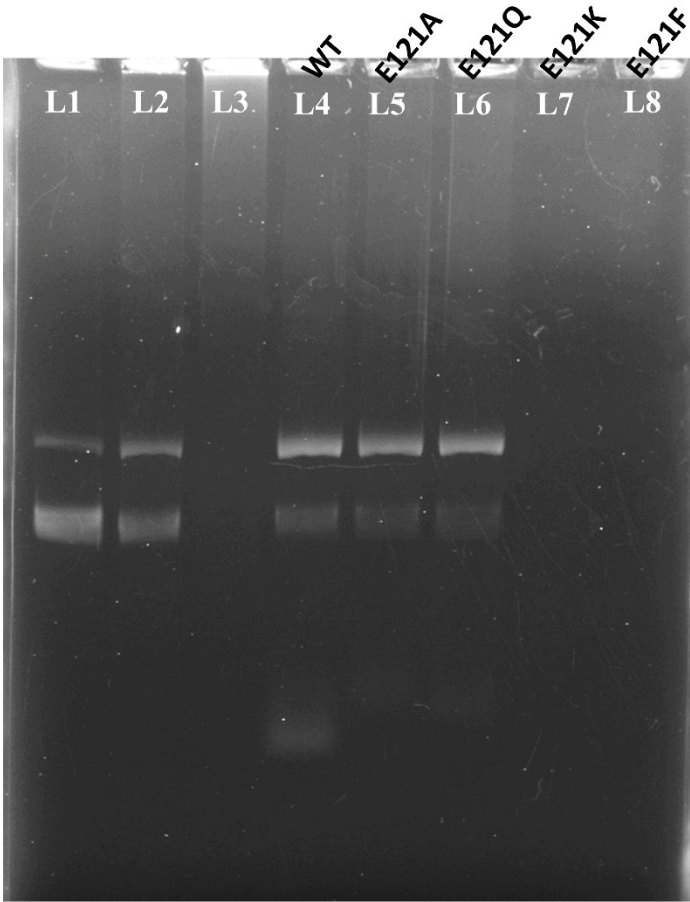

|                               |   |   |   |   |   |   |   |   |
|-------------------------------|---|---|---|---|---|---|---|---|
| DNA                           | + | + | + | + | + | + | + | + |
| FeSO <sub>4</sub>             | - | + | + | + | + | + | + | + |
| H <sub>2</sub> O <sub>2</sub> | - | - | + | + | + | + | + | + |

**Figure S3: Native-PAGE – Coomassie (Protein) Staining**

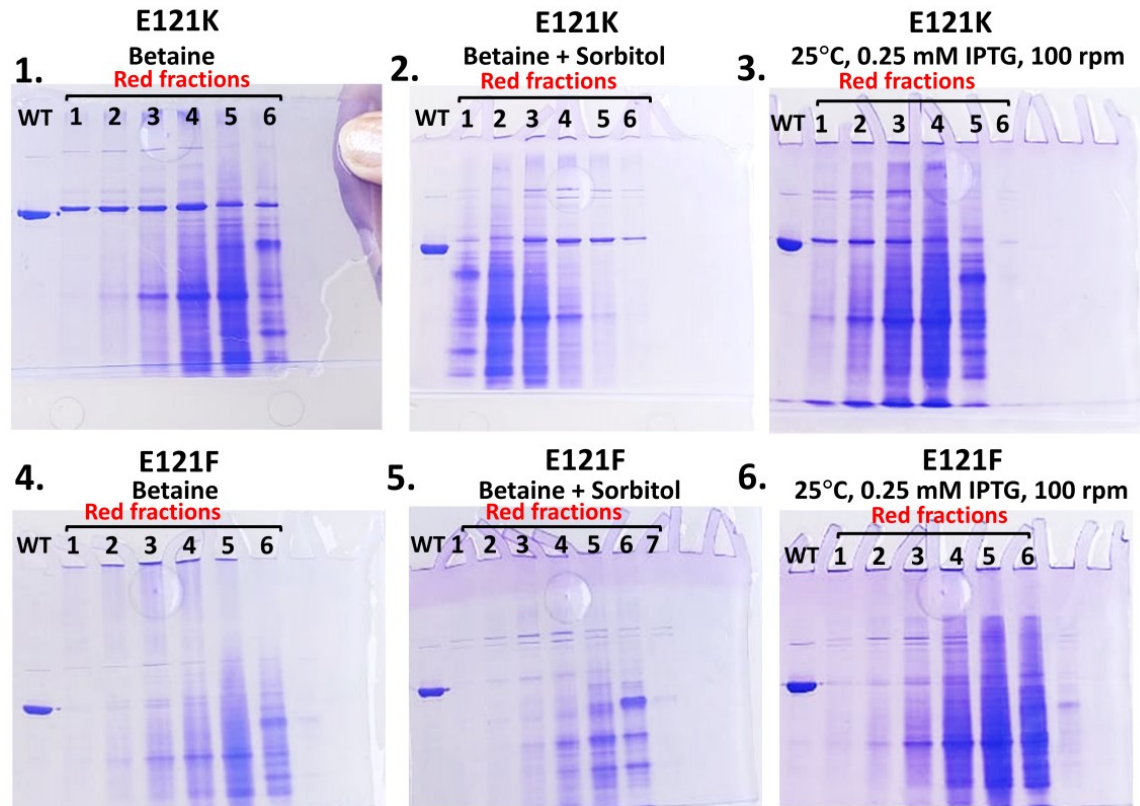

## References

1. Abramson, J et al. Accurate structure prediction of biomolecular interactions with AlphaFold 3. Nature (2024).
